# Supplementary material
Source: publisher figshare collection journal article supplement (https://diabetesjournals.figshare.com/ndownloader/files/35027962)
Supplement: Supplementary file 1 [file 35027962]

## **Supplemental Materials**

### **Roflumilast-mediated phosphodiesterase 4D inhibition reverses diabetes-associated cardiac dysfunction and remodeling: effects beyond glucose lowering**

Rui Xu<sup>1,2,\*</sup>, Jing Fu<sup>1,2,\*</sup>, Yuting Hu<sup>1</sup>, Xiaoyan Yang<sup>1,2</sup>, Xiang Tao<sup>1,3</sup>, Long Chen<sup>3</sup>, Kai Huang<sup>3</sup>, Qin Fu<sup>1,2</sup>

<sup>1</sup>Department of Pharmacology, School of Basic Medicine, Tongji Medical College, Huazhong University of Science and Technology, Wuhan, China;

<sup>2</sup>Key Laboratory for Drug Target Research and Pharmacodynamic Evaluation of Hubei Province, Wuhan, China;

<sup>3</sup>Clinical Center of Human Gene Research, Union Hospital, Tongji Medical College, Huazhong University of Science and Technology, Wuhan, China

\* R. Xu and J. Fu are contributed equally to this work.

#### **Address for Correspondence:**

Qin Fu, PhD

Department of Pharmacology, School of Basic Medicine, Tongji Medical College  
Huazhong University of Science and Technology  
Hangkong Road 13<sup>th</sup>, 430030, Wuhan, China

Tel: +86-27-83692801

Email fuqin@mails.tjmu.edu.cn

## SUPPLEMENTAL TABLE

**Table 1. Clinical characteristics of donors and heart failure patients with diabetes.**

According to the regulations on organ donation in China, the information of donors is confidential.

| Patient   | Diagnosis | Age | Gender | EF  |
|-----------|-----------|-----|--------|-----|
| Donor 1   | N/A       | N/A | N/A    | N/A |
| Donor 2   | N/A       | N/A | N/A    | N/A |
| Donor 3   | N/A       | N/A | N/A    | N/A |
| Donor 4   | N/A       | N/A | N/A    | N/A |
| Donor 5   | N/A       | N/A | N/A    | N/A |
| Donor 6   | N/A       | N/A | N/A    | N/A |
| Patient 1 | DM, RHD   | 51  | Female | 22% |
| Patient 2 | DM, AVR   | 50  | Female | 37% |
| Patient 3 | DM, MVD   | 55  | Male   | 33% |
| Patient 4 | DM, DCM   | 54  | Male   | 16% |
| Patient 5 | DM, CAD   | 44  | Male   | 30% |
| Patient 6 | DM, AVI   | 62  | Male   | 29% |

DM: diabetes mellitus; RHD: rheumatic heart disease; AVR: aortic valve replacement; MVD: mitral valve dysplasia; DCM: dilated cardiomyopathy; CAD: coronary artery disease; AVI: aortic valve insufficiency; N/A: not available.

**Table 2. List of primers.**

| Gene                | Species | Primer | Sequences (5'to3')        |
|---------------------|---------|--------|---------------------------|
| PDE4A               | Mouse   | F      | CTTCTGCGAGACCTGCTCCA      |
|                     |         | R      | GAGTTCCCGGTTTCAGCATCC     |
| PDE4B               | Mouse   | F      | AATGTGGCTGGGTACTCACA      |
|                     |         | R      | AAGGTGTCAGATGAGATTTTAAACG |
| PDE4C               | Mouse   | F      | AGCCAGTGGATTCTGGAGTG      |
|                     |         | R      | TTTCGAGGTCAAAGCTGCTC      |
| PDE4D               | Mouse   | F      | ACCGCCAGTGGACGGACCGGA     |
|                     |         | R      | CATGCCACGCTCCCGCTCTCGG    |
| CREB                | Mouse   | F      | TTGTTGTTCAAGCTGCCTCTG     |
|                     |         | R      | CAGCAGGCTGTGTAGGAAGTG     |
| Sirt1               | Mouse   | F      | GCTGACGACTTCGACGACG       |
|                     |         | R      | TCGGTCAACAGGAGGTTGTCT     |
| ANP                 | Mouse   | F      | TCGTCTTGGCCTTTTGGCT       |
|                     |         | R      | TCCAGGTGGTCTAGCAGGTTCT    |
| BNP                 | Mouse   | F      | CTCCTGAAGGTGCTGTCC        |
|                     |         | R      | GCCATTTCCTCCGACTTT        |
| Collagen1a1         | Mouse   | F      | TAGGCCATTGTGTATGCAGC      |
|                     |         | R      | ACATGTTTCAGCTTTGTGGACC    |
| Fn1                 | Mouse   | F      | ATGTGGACCCCTCCTGATAGT     |
|                     |         | R      | GCCCAGTGATTTTCAGCAAAGG    |
| TGF- $\beta$ 1      | Mouse   | F      | AGCTGCGCTTGCAGAGATTA      |
|                     |         | R      | AGCCCTGTATTCCGTCTCCT      |
| NOX2                | Mouse   | F      | TTGGGTCAGCACTGGCTCTG      |
|                     |         | R      | TGGCGGTGTGCAGTGCTATC      |
| P22 <sup>phox</sup> | Mouse   | F      | GTCCACCATGGAGCGATGTG      |
|                     |         | R      | CAATGGCCAAGCAGACGGTC      |
| SOD2                | Mouse   | F      | CAGACCTGCCTTACGACTATGG    |
|                     |         | R      | CTCGGTGGCGTTGAGATTGTT     |
| GATA4               | Mouse   | F      | ATCTAAGACGCCAGCAGGTC      |
|                     |         | R      | CACAGTACTGAATGTCTGGGAC    |
| MEF2a               | Mouse   | F      | TAAGACAATTTCAACGGCAGC     |
|                     |         | R      | TCGCTTTGTAAAAGTAACCTGTCTG |
| Fbln2               | Mouse   | F      | ACACAGAGCACCGGGGAC        |
|                     |         | R      | CTCGATGCAGTTCTCCAGCA      |
| MMP2                | Mouse   | F      | AATGTGGCTGGGTACTCACA      |
|                     |         | R      | AAGGTGTCAGATGAGATTTTAAACG |
| MMP9                | Mouse   | F      | CAAATTCTTCTGGCGTGTGA      |
|                     |         | R      | CGGTTGAAGCAAAGAAGGAG      |
| TIMP1               | Mouse   | F      | AGAGACACACCAGAGCAGATAC    |
|                     |         | R      | GGGAACCCATGAATTTAGCCCT    |
| TIMP2               | Mouse   | F      | GGCTGTGAGTGCAAGATCACT     |
|                     |         | R      | CGCGCAAGAACCATCACTTC      |
| 18s                 | Mouse   | F      | TTGACGGAAGGGCACCACCAG     |
|                     |         | R      | GCACCACCACCCACGGAATCG     |
| ANP                 | Rat     | F      | CAACACAGATCTGATGGATTCA    |

|                     |     |   |                        |
|---------------------|-----|---|------------------------|
|                     |     | R | CCTCATCTTCTACCGGCATC   |
| BNP                 | Rat | F | GCTGCTGGAGCTGATAAGAGAA |
|                     |     | R | GTTCTTTTGTAGGGCCTTGGTC |
| Collagen1a1         | Rat | F | ATGTTTCAGCTTTGTGGAC    |
|                     |     | R | GGATGCCATCTTGTCCAG     |
| Fn1                 | Rat | F | CCACAGCCATTCTGCGCCA    |
|                     |     | R | TCACCCGCACTCGGTAGCCA   |
| TGF- $\beta$ 1      | Rat | F | GGGCTACCATGCCAACTTCTG  |
|                     |     | R | GAGGGCAAGGACCTTGCTGTA  |
| NOX2                | Rat | F | CTGCCAGTGTGTCTCGGAATCT |
|                     |     | R | TGTGAATGGCCGTGTGAAGT   |
| P22 <sup>phox</sup> | Rat | F | CCTCCACTTACTGCTGTCCG   |
|                     |     | R | GTAGGTGGCTGCTTGATGGT   |
| SOD2                | Rat | F | ACGCGACCTACGTGAACAAT   |
|                     |     | R | TAACATCTCCCTTGGCCAGC   |
| 18s                 | Rat | F | TTGACGGAAGGGCACCACCAG  |
|                     |     | R | GCACCACCACCCACGGAATCG  |

**Table 3. List of antibodies.**

| Antibody                      | Company             | Catalog#   |
|-------------------------------|---------------------|------------|
| Akt                           | Cell Signaling      | 9272       |
| collagen 1                    | Proteintech         | 14695-1-AP |
| CREB                          | Bimake              | A5014      |
| cTNT                          | Abcam               | ab8295     |
| Fibronectin1                  | Proteintech         | 15613-1-AP |
| FoxO3a                        | Cell Signaling      | 2497       |
| GAPDH                         | Proteintech         | 60004-1-Ig |
| GFP                           | Santa Cruz          | sc-8334    |
| PDE4D                         | Proteintech         | 12918-1-AP |
| PDE4D3                        | FabGennix           | 431AP      |
| PDE4D5                        | FabGennix           | 451AP      |
| PDE4D9                        | FabGennix           | 491AP      |
| phospho-Akt (Ser473)          | Cell Signaling      | 4051       |
| phospho-CREB (Ser133)         | Cell Signaling      | 9198       |
| phospho-FoxO3a (Ser253)       | Cell Signaling      | 9466       |
| phospho-PDE4D (Ser190)        | Abcam               | ab59212    |
| phospholamban                 | Affinity Bioreagent | MA3-922    |
| phospho-phospholamban (Ser16) | Millipore           | 07-52      |
| phospho-Smad2 (Ser250)        | Bimake              | A5192      |
| SERCA2                        | Bimake              | A5708      |
| Sirt1                         | Abclonal            | A19667     |
| Smad2                         | Bimake              | A5117      |
| TGF- $\beta$ 1                | Santa Cruz          | sc-65378   |
| Vimentin                      | proteintech         | 10366-1-AP |
| Pan Acetyl-Lysine *           | Abclonal            | A2391      |

\* Immunoprecipitation

|                                  |                                       |
|----------------------------------|---------------------------------------|
| Abclonal (Boston, MA, USA)       | Affinity Bioreagent (Golden, CO, USA) |
| Bimake (Houston, TX, USA)        | Cell Signaling (Danvers, MA, USA)     |
| FabGennix (Frisco, TX, USA)      | Millipore (Billerica, MA, USA)        |
| Santa Cruz (Santa Cruz, CA, USA) | Proteintech (Chicago, IL, USA)        |
| Abcam (Boston, MA, USA)          |                                       |

## SUPPLEMENTAL FIGURES AND FIGURE LEGENDS

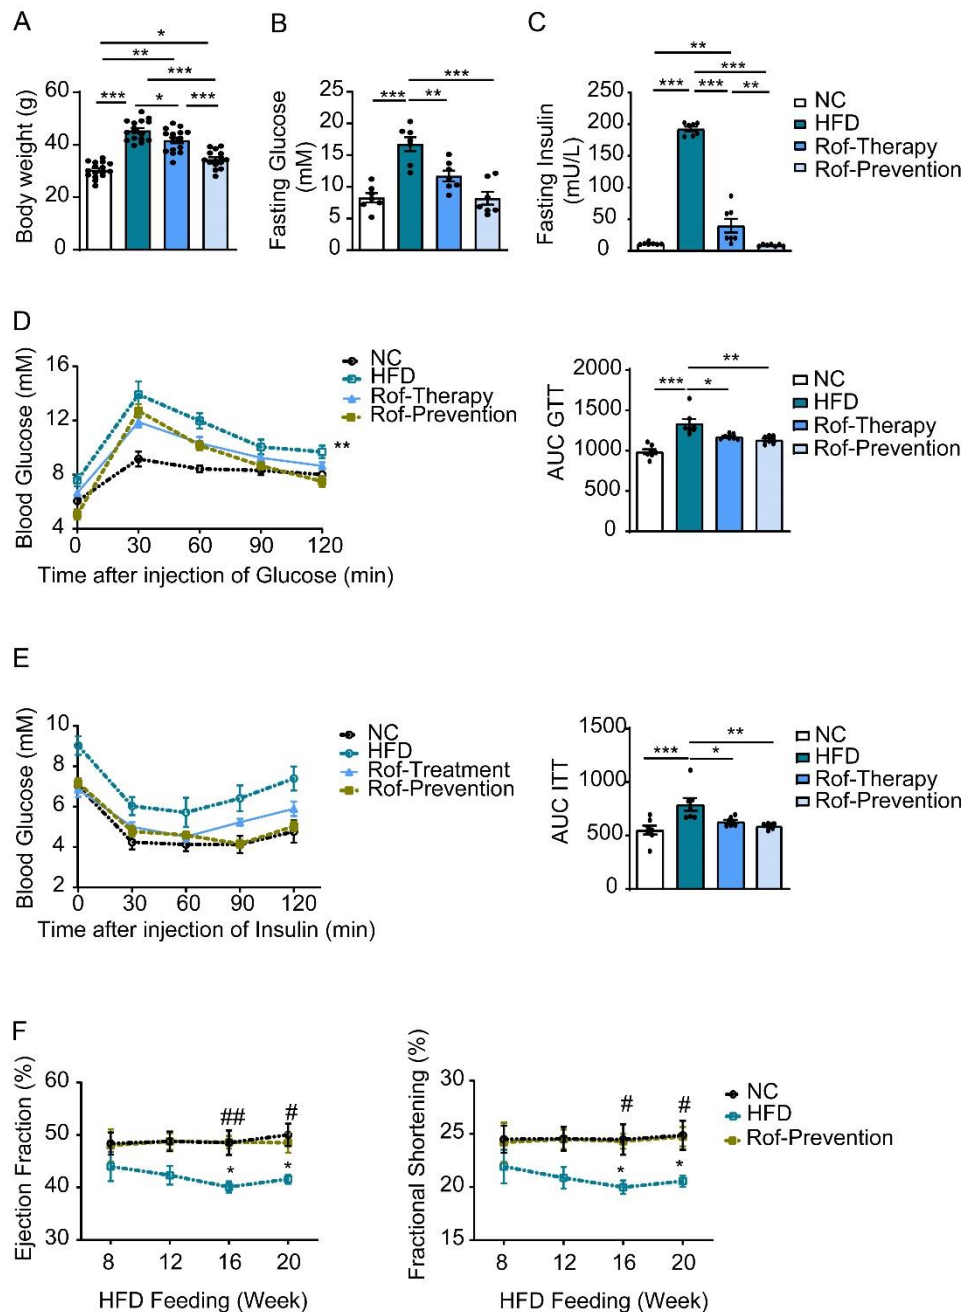

**Supplemental Figure 1. PDE4 Inhibitor Roflumilast Improves HFD-Induced Hyperglycemia, Hyperinsulinemia and Cardiac Dysfunction.** Mice fed with normal chow or HFD were co-treated with roflumilast for 20 weeks (Rof-prevention) or treated with roflumilast for 4 weeks (Rof-therapy) post 16 weeks feeding. **A**, Body weight was measured. n=15-16 mice per group. **B** and **C**, fasting blood glucose (**B**) and serum insulin (**C**) were

measured after overnight fasting. n=7 mice per group. **D**, Oral glucose tolerance testing (GTT) and areas under curve of each group are shown. n=7 mice per group. **E**, Insulin tolerance testing (ITT) and areas under curve of each group are shown. n=7 mice per group. \*P<0.05, \*\*P<0.01, \*\*\*P<0.001 by 1-way ANOVA and Tukey's multiple comparison test. **F**, Time-course analysis of cardiac contractile function-Ejection Fraction and Fractional Shortening were measured by echocardiography, n=7-10 mice per group. All data are presented as mean±SEM. **D left and F**, \*P<0.05, \*\*P<0.01, NC vs. HFD; # P<0.05 HFD vs. Rof-Prevention by 2-way ANOVA and Tukey's multiple comparison test.

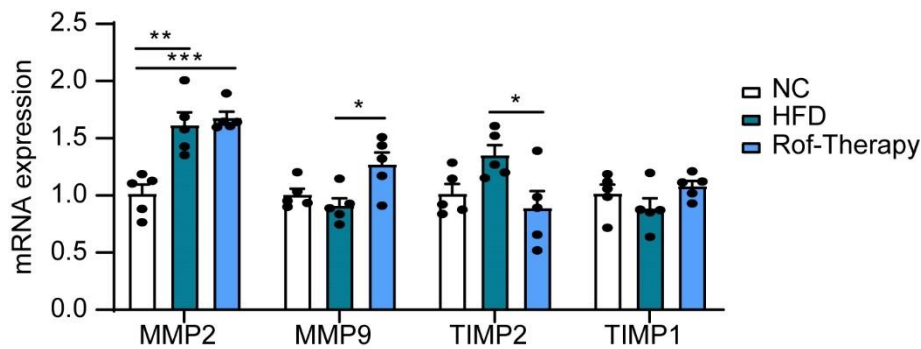

**Supplemental Figure 2. The effects of PDE4 Inhibitor Roflumilast on MMPs and TIMPs expression in HFD heart.** Transcript levels of indicated genes involved in cardiac ECM remodeling (MMP2, MMP9, TIMP2 and TIMP1), n=5 mice per group. All data are presented as mean±SEM. \*P<0.05, \*\*P<0.01, \*\*\*P<0.001 by 1-way ANOVA and Tukey's multiple comparison test. HFD, high-fat diet; NC, normal chow; Rof, roflumilast; MMP, matrix metalloproteinase; TIMP, tissue inhibitor of matrix metalloproteinases.

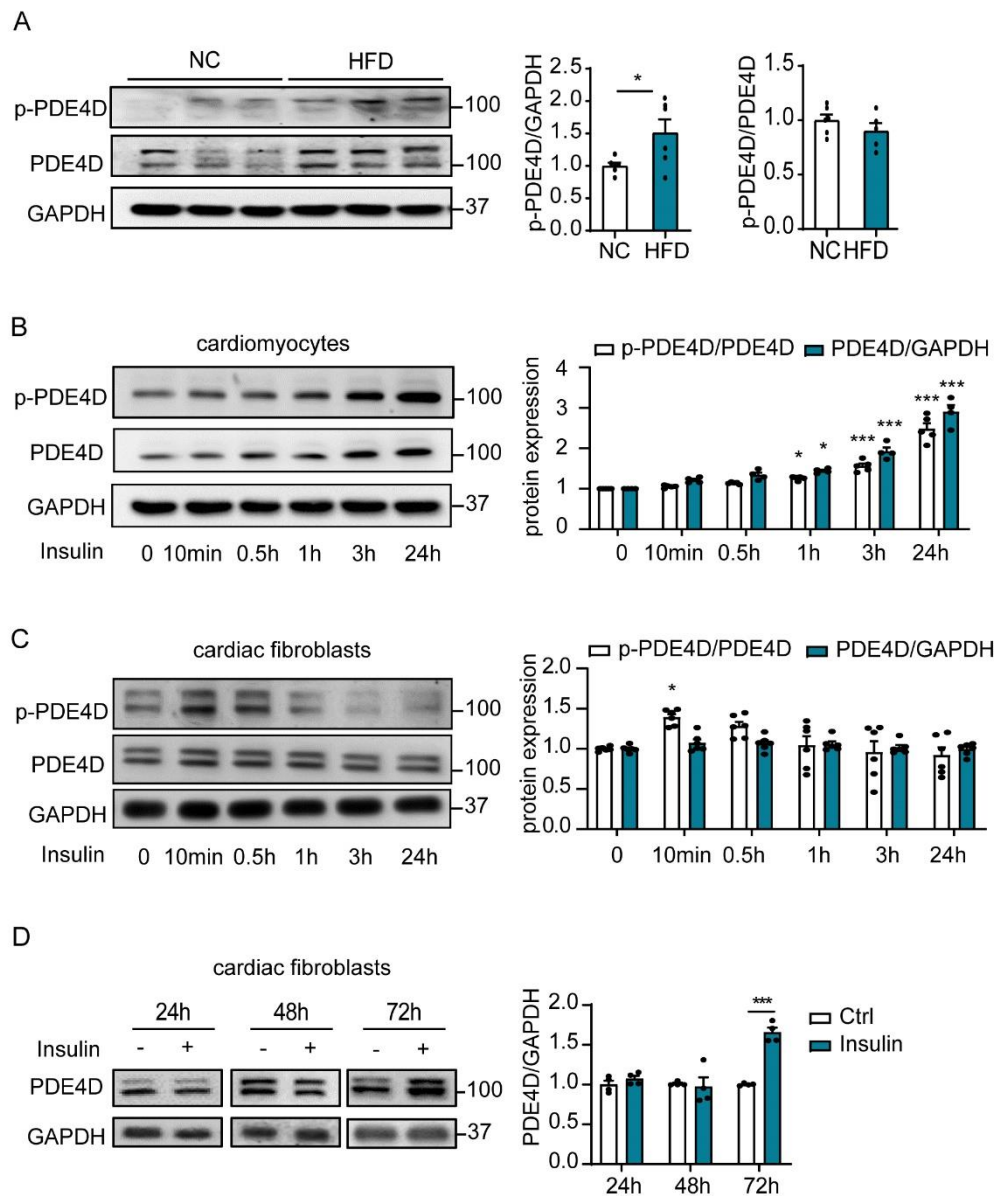

**Supplemental Figure 3. The expression of phospho-PDE4D and PDE4D is increased in HFD mouse hearts or insulin-treated cardiomyocytes and cardiac fibroblasts. A,** Western blotting analysis of phospho-PDE4D and PDE4D expression in indicated hearts after 20 weeks' chow or HFD feeding, n=5-6 mice per group. **B,** Western blotting analysis of phospho-PDE4D and PDE4D expression with insulin (100nM) treatment for different time in neonatal rat cardiomyocytes, n=4-5 samples per group. **C,** Western blotting analysis



of phospho-PDE4D and PDE4D expression with insulin (100nM) treatment for different time in neonatal rat cardiac fibroblasts, n=6 samples per group. D, Western blotting analysis of PDE4D expression in neonatal rat cardiac fibroblasts treated with insulin (100nM) for indicated time, n=4 samples per group. All data are presented as mean $\pm$ SEM. A and D, \*P<0.05, \*\*\*P<0.001 by unpaired t test. B and C, \*P<0.05, \*\*\*P<0.001 vs. 0 min by 1-way ANOVA and Tukey's multiple comparison test. HFD, high-fat diet; NC, normal chow; Rof, roflumilast.

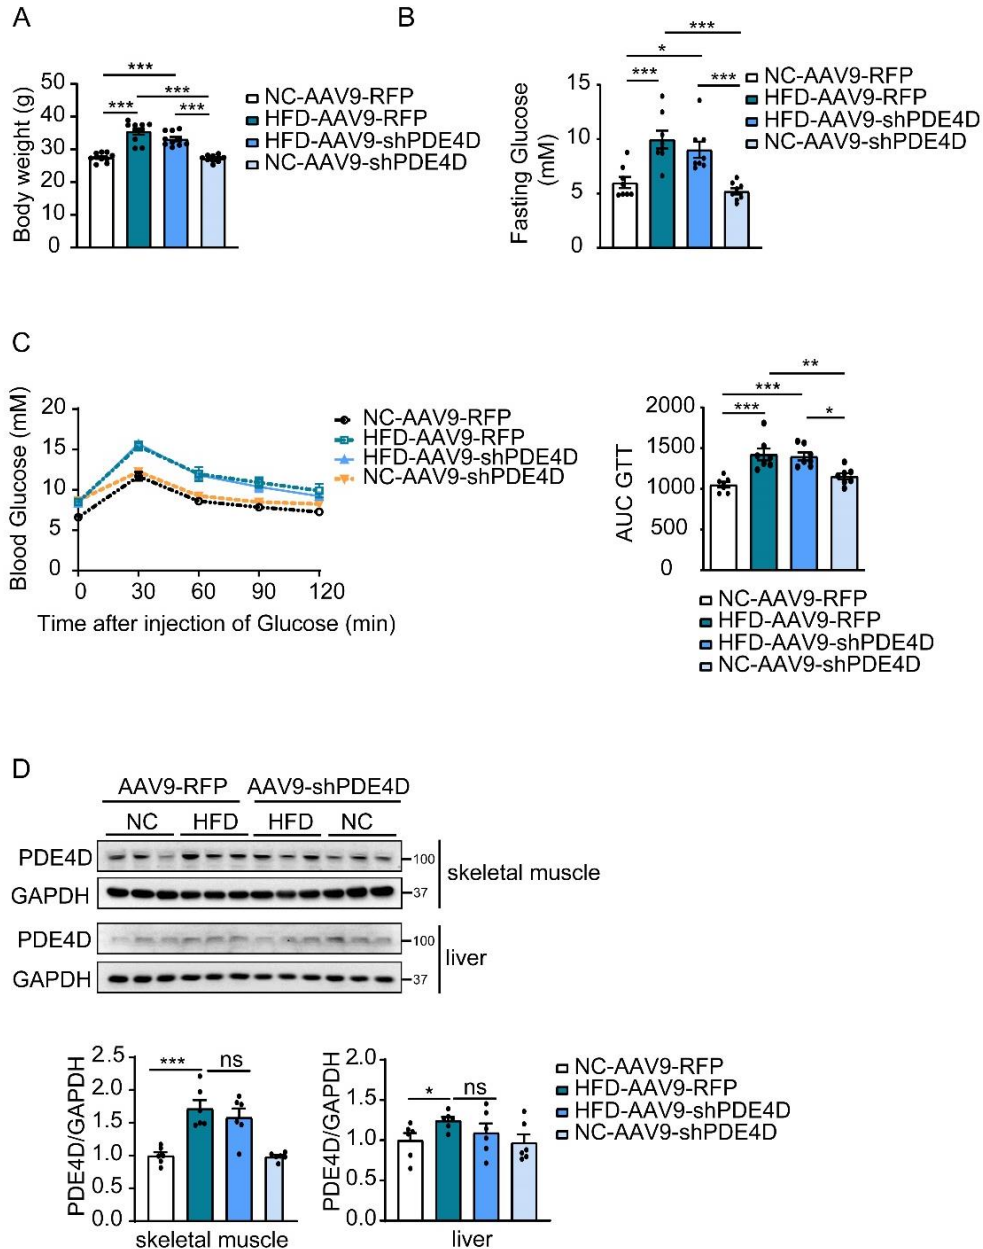

**Supplemental Figure 4. Cardiac PDE4D Suppression Prevents Cardiac Dysfunction Independent of Glucose Metabolism in HFD Mice.** Mice were fed with normal chow or HFD subjected to injections with AAV9-RFP or AAV9-shPDE4D for 5 weeks. **A** and **B**, Body weight (**A**) and fasting blood glucose (**B**) were measured in indicated groups.  $n=8-10$  mice per group. **C**, Oral glucose tolerance testing (GTT) and areas under curve of each group are shown.  $n=7$  mice per group. **D**, Western blotting analysis of PDE4D expression in skeletal muscle (upper and left) and liver (bottom and right),  $n=6$  mice per group. All data are presented as mean $\pm$ SEM. **A** through **C**, \* $P<0.05$ , \*\* $P<0.01$ , \*\*\* $P<0.001$  by 1-way ANOVA and Tukey's

multiple comparison test. **D**, \* $P < 0.05$ , \*\*\* $P < 0.001$  by unpaired t test.

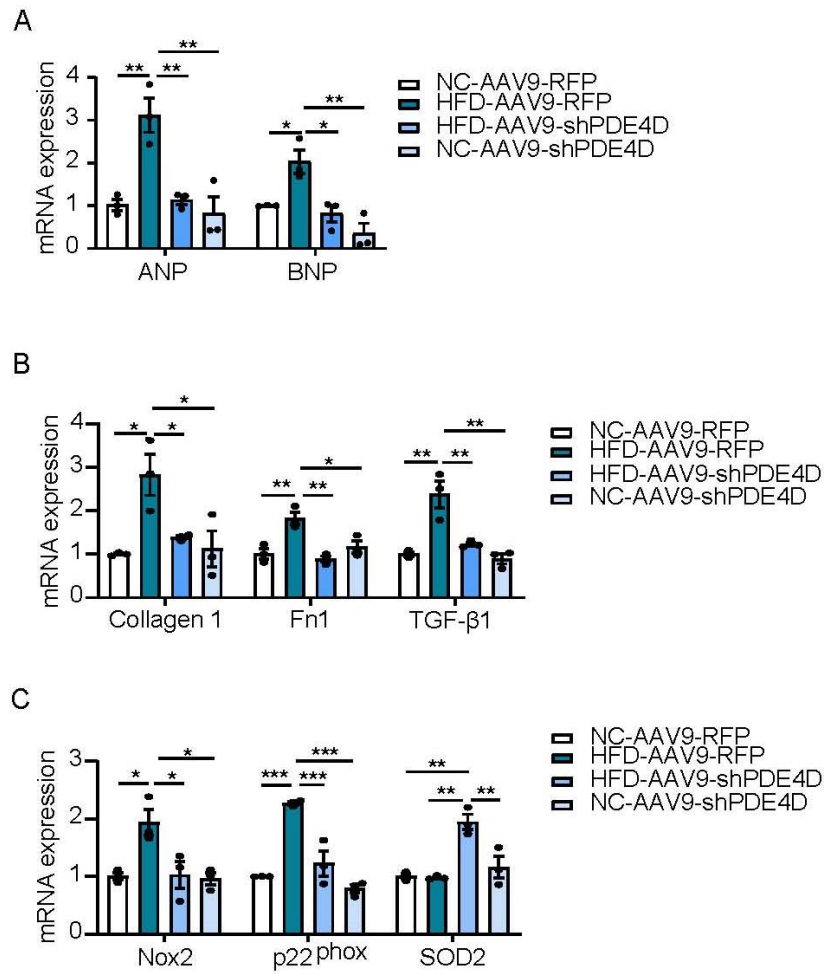

**Supplemental Figure 5. Cardiac PDE4D Suppression Reverses HFD-Induced Cardiac Remodeling.** **A** through **C**, Transcript levels of indicated genes involved in cardiac hypertrophy (ANP and BNP) (**A**), fibrosis (Collagen 1, Fn1 and TGF-β1) (**B**), and oxidative stress (NOX2, p22<sup>phox</sup> and SOD2) (**C**) in NC or HFD mice injected with AAV9-shPDE4D or AAV9-RFP, n=3 mice per group. All data are presented as mean±SEM. \* $P < 0.05$ , \*\* $P < 0.01$ , \*\*\* $P < 0.001$  by 1-way ANOVA and Tukey's multiple comparison test.

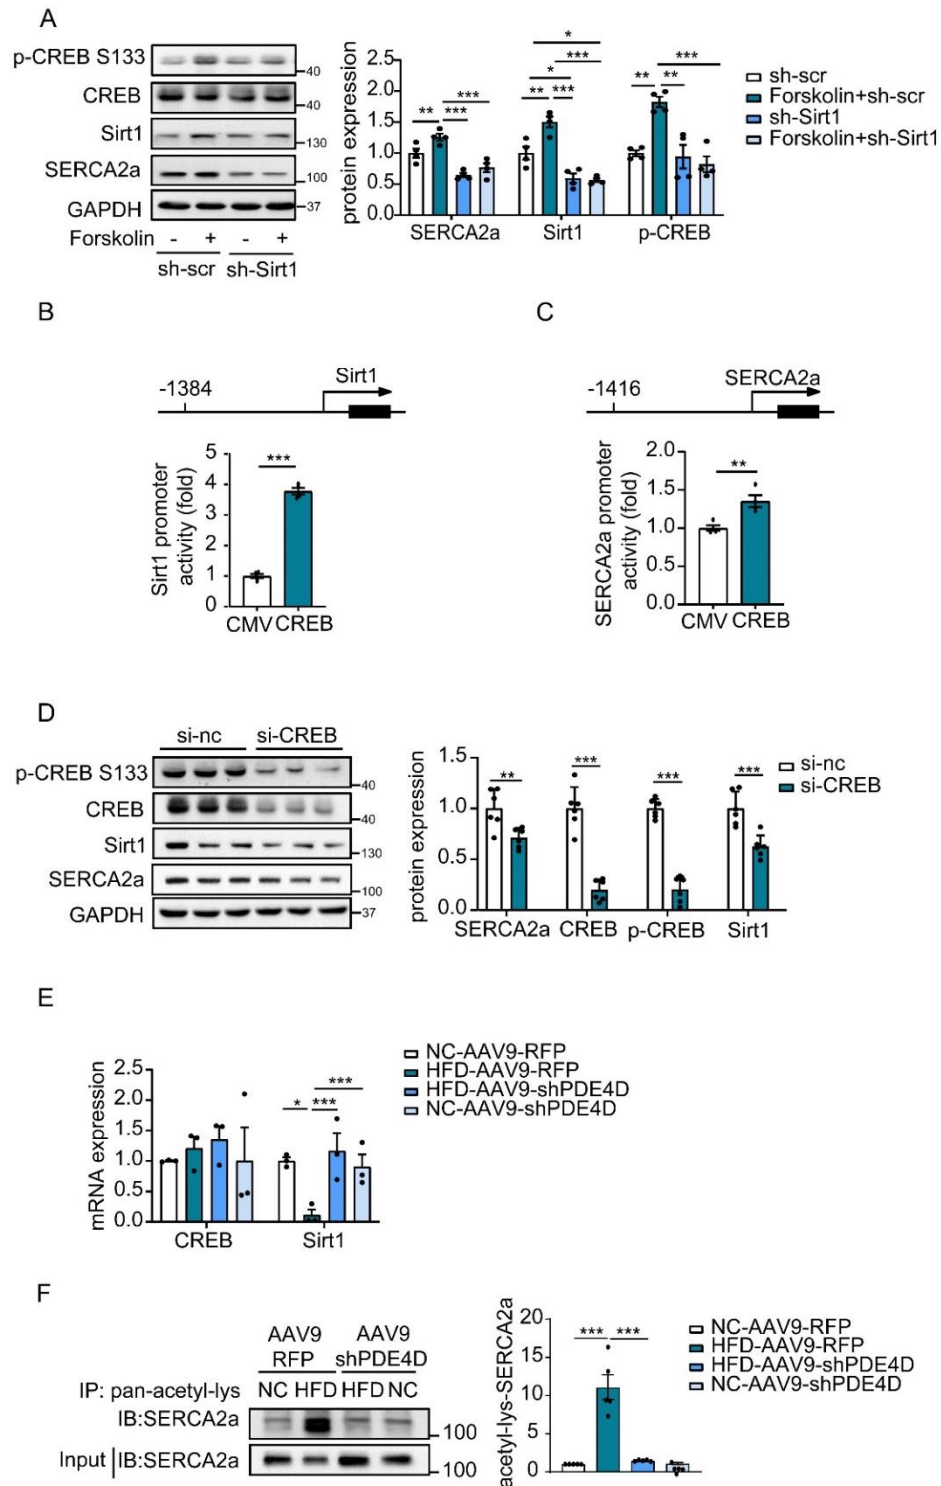

**Supplemental Figure 6. PDE4D Inhibition Preserves SERCA2a Expression in Cardiomyocytes via cAMP/PKA/CREB/Sirt1 Signaling Pathway.** A, Western blotting analyses of the expression of phosphorylation of CREB, Sirt1 and SERCA2a in NRVMs were transfected with control scramble (sh-scr) or Sirt1-shRNA (sh-Sirt1) treated with or without

PKA activator Forskolin (10 $\mu$ M, 24h), n=4 samples per group. **B** and **C**, Luciferase activity in 293T cells co-transfected with constructed Sirt1 (100ng; -1384/+277 relative to the transcription start site) promoter reporter plasmid (**B**) or constructed SERCA2a (100ng; -1416/+251 relative to the transcription start site) promoter reporter plasmid (**C**) or pRL-TK (10ng) and CREB plasmid (200ng) or control scramble (CMV), n=4 samples per group. **D**, Western blotting analyses of the expression of phosphorylation of CREB, Sirt1 and SERCA2a in NRVMs transfected with siRNA negative control (si-nc) or CREB siRNA (si-CREB), n=4 samples per group. **E**, Transcript levels of CREB and Sirt1 in hearts from NC and HFD mice subjected to injection with AAV9-RFP or AAV9-shPDE4D, n=3 mice per group. **F**, Anti-Pan Acetyl-Lysine IP was followed by Western blotting. The protein levels of SERCA2a in the precipitates were determined with protein-specific primary antibodies in indicated groups. n=5 mice per group. All data are presented as mean $\pm$ SEM. **A**, **E** and **F**, \*P<0.05, \*\*P<0.01, \*\*\*P<0.001 by 1-way ANOVA and Tukey's multiple comparison test. **B** through **D**, \*\*P<0.01, \*\*\*P<0.001 by unpaired t test.

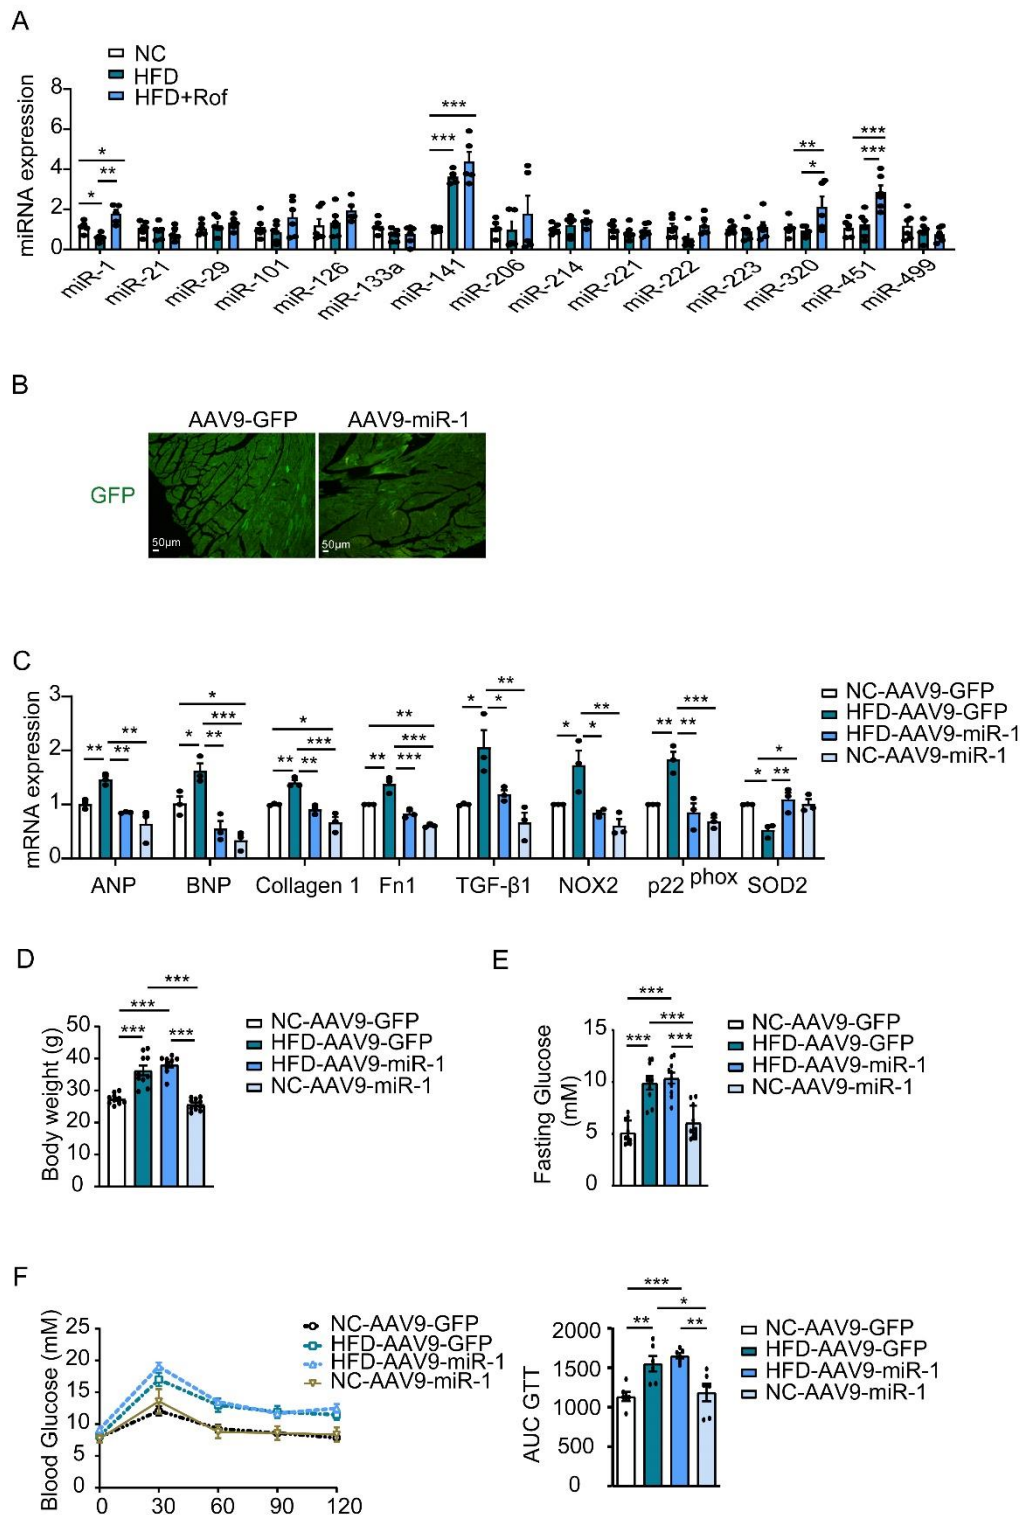

**Supplemental Figure 7. Cardiac miR-1 Overexpression Rescues Cardiac Remodeling and Dysfunction Independent of Glucose Metabolism in HFD Mice.** A, qRT-PCR analysis of the expression of indicated microRNAs involved in diabetic cardiomyopathy in hearts from

NC or HFD mice treated with roflumilast for 4 weeks, n=5-6 mice per group. **B**, Representative images of GFP expression in indicated hearts. Scale bar, 50  $\mu$ m. **C** through **F**, Mice were fed with normal chow or HFD injected with AAV9-GFP or AAV9-miR-1 for 4 weeks. **C**, qRT-PCR analysis of cardiac hypertrophy, fibrosis, and oxidative stress-related genes expression in indicated hearts, n=3 mice per group. **D** and **E**, Body weight and fasting blood glucose were measured in indicated groups. n=9-10 mice per group. **E**, Oral glucose tolerance testing (GTT) and areas under curve were measured in indicated groups, n=6 mice per group. All data are presented as mean $\pm$ SEM. **A**, **C** through **F**, \*P<0.05, \*\*P<0.01, \*\*\*P<0.001 by 1-way ANOVA and Tukey's multiple comparison test.

**A**

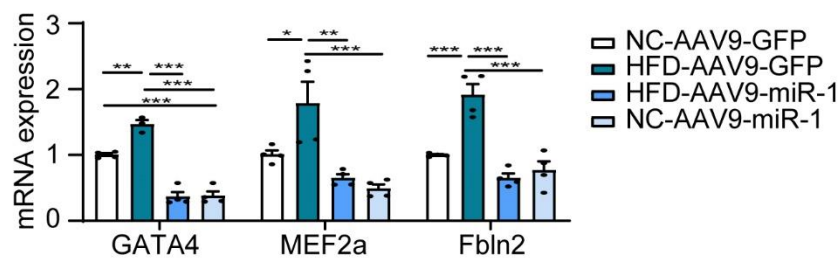

**B**

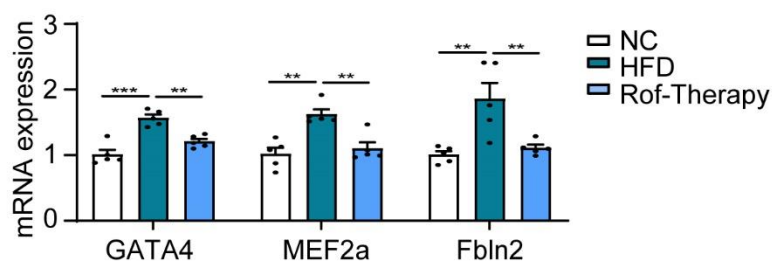

**C**

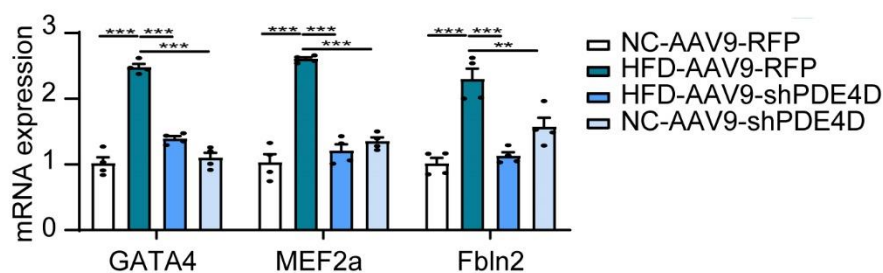

**Supplemental Figure 8. miR-1 Target Genes are upregulated in HFD-Induced Cardiac Remodeling.** A through C, Transcript levels of miR-1 target genes involved in HFD-induced cardiac hypertrophy (GATA4 and MEF2a) and fibrosis (MEF2a and Fbln2) in hearts from NC or HFD mice subjected by treatment with AAV9-miR-1 (**A**), roflumilast (**B**) and AAV9-shPDE4D5 (**C**). n=3-5 mice per group. \*P<0.05, \*\*P<0.01, \*\*\*P<0.001 by 1 - way ANOVA and Tukey's multiple comparison test.



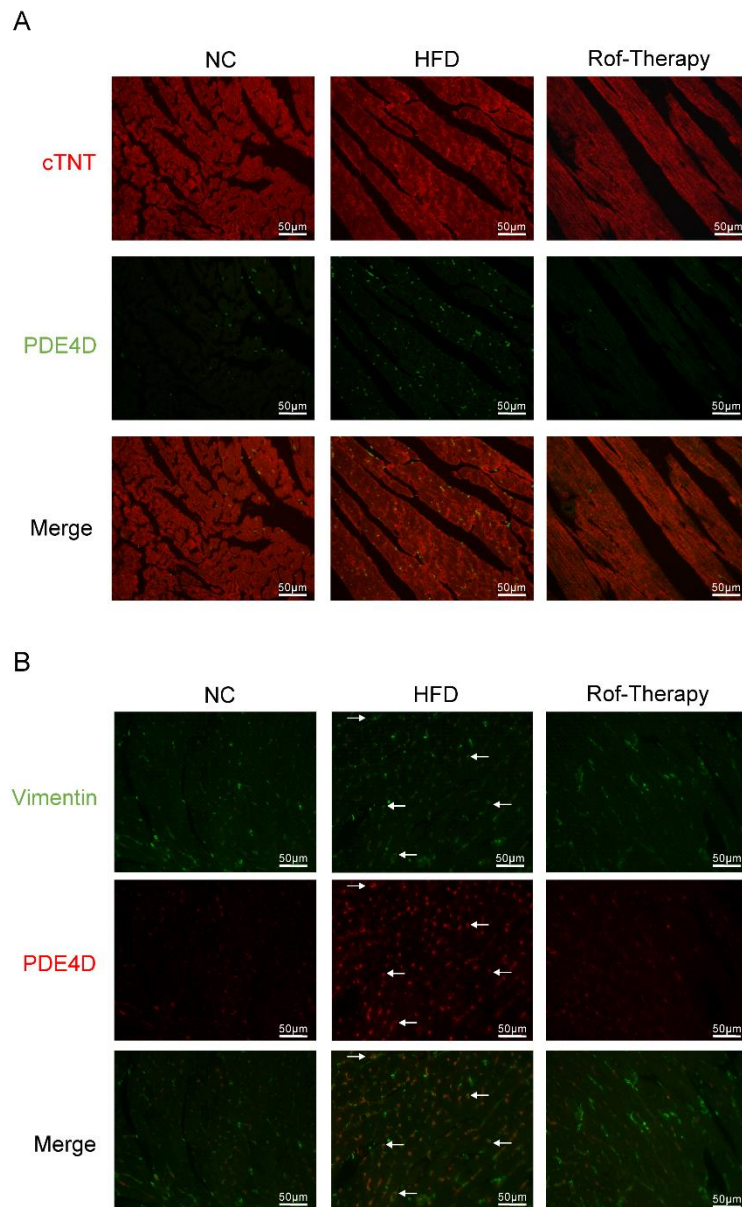

**Supplemental Figure 9. PDE4D Inhibition Reduces PDE4D Expression in Cardiomyocytes and Cardiac Fibroblasts in HFD Mice.** Representative immunofluorescence images of PDE4D and cTNT (cardiomyocytes marker; A) or PDE4D and vimentin (cardiac fibroblasts marker; B) in indicated mice heart. Scale bar, 50µm. White arrow indicates co-expression of PDE4D with vimentin.

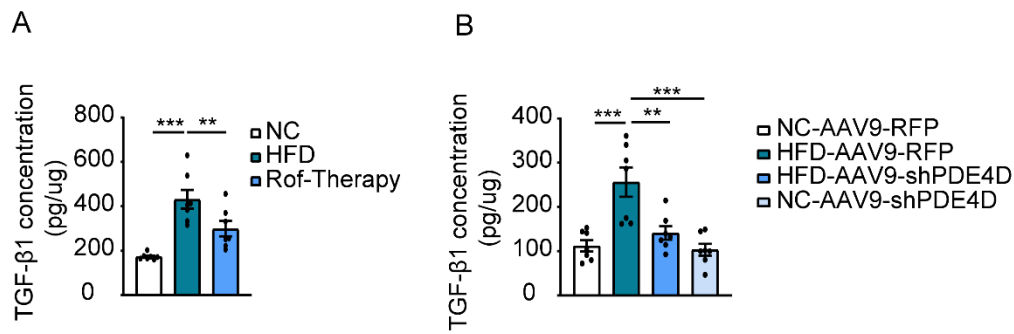

**Supplemental Figure 10. PDE4D Inhibition Decreases TGF-β1 Activity in Heart Tissues from HFD Mice.** **A**, Summary data of TGF-β1 activity in heart tissue from NC or HFD mice treated with roflumilast for 4 weeks, n=7 mice per group. **B**, TGF-β1 activity in heart tissue from NC and HFD mice injected with AAV9-RFP or AAV9-shPDE4D, n=7 mice per group. All data are presented as mean±SEM. \*\*P<0.01, \*\*\*P<0.001 by 1-way ANOVA and Tukey's multiple comparison test.

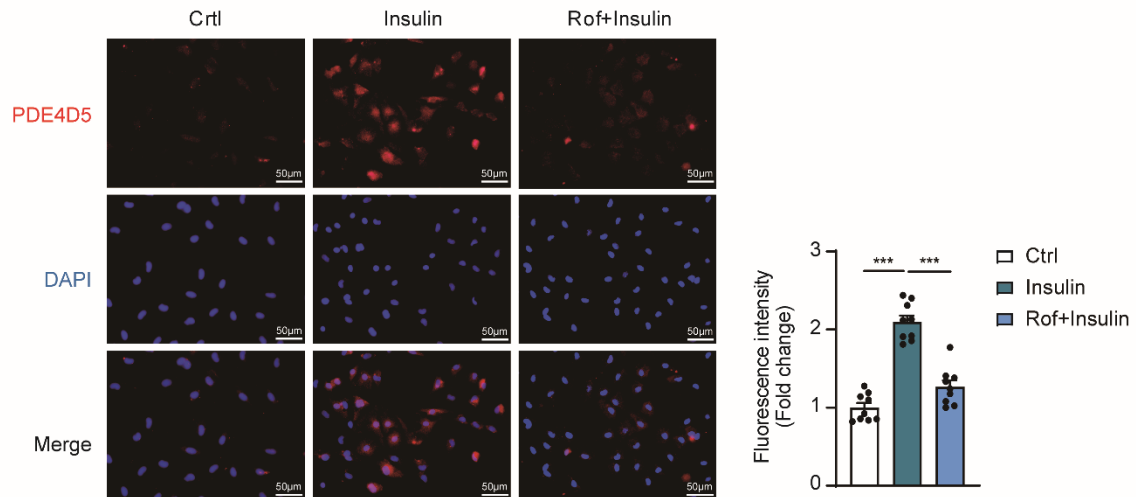

**Supplemental Figure 11. Roflumilast Reduces Insulin-induced PDE4D5 Expression in Cardiac Fibroblasts.** Representative immunofluorescence images and analyses of the expression of PDE4D5 in NRCFs treated with insulin (100 nM, 72h) in the presence or absence of roflumilast (100 nM), from N = 9 fields of view from three independent experiments. Scale bar, 50µm. All data are presented as mean±SEM. \*\*\*P<0.001 by 1-way ANOVA and Tukey's multiple comparison test.
